# Supplementary material
Source: PubMed Central journal article supplement (PMC8721894)
Supplement: NIHMS1645149-supplement-Supplementary_Info__1.pdf [file NIHMS1645149-supplement-Supplementary_Info__1.pdf]

## Supplementary Method 1. Diagram representing the positioning of calvarial landmarks

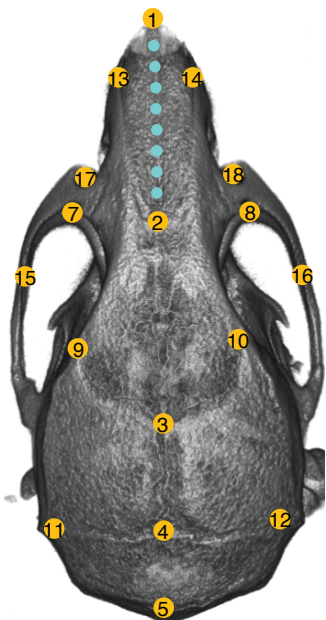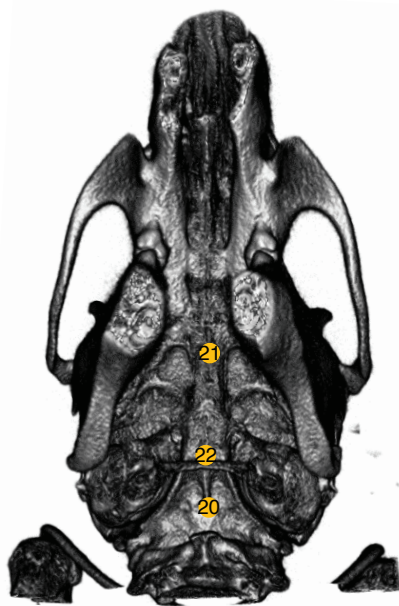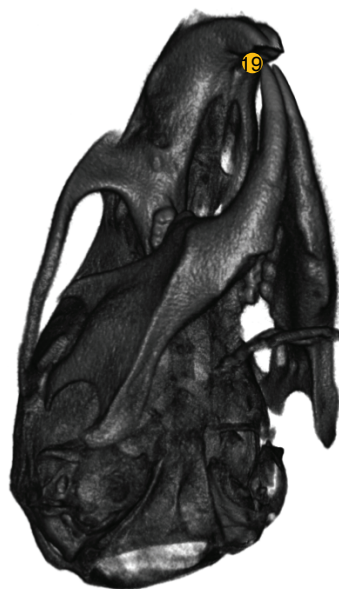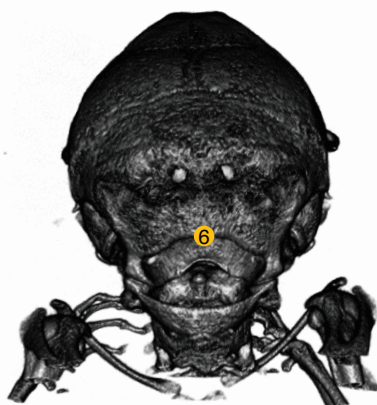

| Landmark # | Anatomical Description                                        |
|------------|---------------------------------------------------------------|
| 1          | Rhinion                                                       |
| 2          | Nasion                                                        |
| 3          | Bregma                                                        |
| 4          | Lambda                                                        |
| 5          | Most posterior point in midline on occipital                  |
| 6          | Junction between occipital and occipital condyle in midline   |
| 7          | (L) Frontotemporal                                            |
| 8          | (R) Frontotemporal                                            |
| 9          | (L) Coronal                                                   |
| 10         | (R) Coronal                                                   |
| 11         | (L) Junction between interparietal and lambdoidal sutures     |
| 12         | (R) Junction between interparietal and lambdoidal sutures     |
| 13         | Anterior-most point along the left nasomaxillary suture       |
| 14         | Anterior-most point along the right nasomaxillary suture      |
| 15         | (R) superior-most point of the zygo-maxillary suture          |
| 16         | (L) superior-most point of the zygo-maxillary suture          |
| 17         | (R) Point of greatest concavity along the premaxillary suture |
| 18         | (L) Point of greatest concavity along the premaxillary suture |
| 19         | Internal prosthion                                            |
| 20         | Superior nuchal line in midline                               |
| 21         | Anterior-most point of the presphenoid in midline             |
| 22         | Spheno-occipital synchondrosis in midline                     |
| ●          | 8 Semi-landmarks, equally spaced between rhinion and nasion   |
