# Supplementary material
Source: PubMed Central journal article supplement (PMC8721894)
Supplement: NIHMS1645149-supplement-Supplementary_Info__2.pdf [file NIHMS1645149-supplement-Supplementary_Info__2.pdf]

## Supplementary Method 2. Diagram representing the positioning of mandibular landmarks

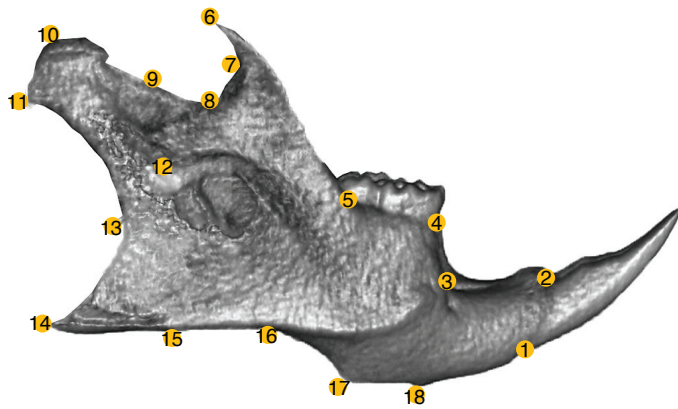

| Landmark # | Anatomical Description                                                                |
|------------|---------------------------------------------------------------------------------------|
| 1          | Inferior junction of incisor and mandible                                             |
| 2          | Superior junction of incisor and mandible                                             |
| 3          | Most ventral point of the diastema                                                    |
| 4          | Most antero-dorsal point of the M1 alveolus                                           |
| 5          | Most postero-dorsal point of the third molar alveolus                                 |
| 6          | Apex of coronoid process                                                              |
| 7          | Most anterior point of the posterior edge of coronoid process                         |
| 8          | Most ventral point between coronoid and condylar processes                            |
| 9          | Most dorsal point of condylar process, at the joint with the articular disc           |
| 10         | Most dorsal point of condylar process                                                 |
| 11         | Most ventral point of condylar process, at the joint with the articular disc          |
| 12         | Most anterior edge of mandibular foramen                                              |
| 13         | Most anterior point between condylar and angular processes                            |
| 14         | Tip of angular process                                                                |
| 15         | Most ventral point of angular process                                                 |
| 16         | Most dorsal point of masseteric ridge                                                 |
| 17         | Anterior edge of the coalescence of masseteric ridge with post-symphyseal rugged area |
| 18         | Most ventral point on mandibular symphysis                                            |
